# Supplementary material for: Development and Comparison of Treatment Decision Tools for Glucocorticoid-Induced Osteoporosis
Source: MDPI journal article supplement (doi:10.3390/diagnostics14040452), 2024-02-19
Supplement: s1 [file s1]

## Development and Comparison of Treatment Decision Tools for Glucocorticoid-Induced Osteoporosis

**Supplementary Table S1.** Treatment recommendations of IOF-ECTS and ACR.

**Supplementary Table S2.** Characteristics of all study participants.

**Supplementary Table S3.** Demographic data of study participants in derivation and validation cohorts.

**Supplementary Table S4.** Univariate logistic regression in the derivation set.

**Supplementary Figure S1.** Selection of candidate predictors by LASSO logistic regression method.

**Supplementary Table S5.** Model development by adding candidate predictors in sequence (A), discriminative (B) and calibration plot (C) of selected model

### Supplemental References

**Supplementary Table S1. Treatment recommendations of IOF-ECTS and ACR**

| <b>Society</b>  | <b>Year</b>         | <b>Treatment case finding strategy</b>                                                                                                                                                                                                                                                                                                                                                                                                                                                                                                                                                      | <b>Reference</b> |
|-----------------|---------------------|---------------------------------------------------------------------------------------------------------------------------------------------------------------------------------------------------------------------------------------------------------------------------------------------------------------------------------------------------------------------------------------------------------------------------------------------------------------------------------------------------------------------------------------------------------------------------------------------|------------------|
| <b>IOF-ECTS</b> | 2012                | <ol style="list-style-type: none"> <li>1. Prior history of OP fracture <b>OR</b></li> <li>2. Age <math>\geq 70</math> years <b>OR</b></li> <li>3. Prednisolone <math>\geq 7.5</math> mg/day <b>OR</b></li> <li>4. GC-adjusted FRAX above intervention threshold</li> </ol>                                                                                                                                                                                                                                                                                                                  | [1]              |
| <b>ACR</b>      | 2017<br>2022 update | <p>Fracture risk stratified as “moderate, high or very high” (age<math>\geq 40</math>), described as</p> <ol style="list-style-type: none"> <li>1. Prior history of OP fractures <b>OR</b></li> <li>2. BMD T-score between -1 and -2.4 <b>OR</b></li> <li>3. BMD T-score <math>\leq -2.5</math></li> <li>4. GC-adjusted FRAX 10-year risk for major osteoporotic fracture <math>\geq 10\%</math> <b>OR</b></li> <li>5. GC-adjusted FRAX 10-year risk for hip fracture <math>\geq 1\%</math> <b>OR</b></li> <li>6. 30mg/day or cumulative GC doses <math>\geq 5</math> grams/year</li> </ol> | [2,3]            |

IOF-ECTS, International Osteoporosis Foundation-European Calcified Tissue Society; ACR, American College of Rheumatology; GC, glucocorticoid; OP, osteoporosis; MP, menopause;  
<sup>a</sup>  $\geq 7.5$  mg/prednisolone or equivalent/day

**Supplementary Table S2. Characteristics of all study participants.**

| Variables                             | All participants<br>N = 401 |
|---------------------------------------|-----------------------------|
| Age (years)                           | 57.5 ± 8.3                  |
| Female, n (%)                         | 345 (86.0)                  |
| Body weight (kg)                      | 58.2 ± 11.0                 |
| Body height (cm)                      | 156.4 ± 6.7                 |
| Body mass index (kg/cm <sup>2</sup> ) | 23.8 ± 3.9                  |
| New fracture +, n (%)                 | 78 (19.5)                   |
| Fracture risk factors                 |                             |
| Rheumatic diseases, n (%)             |                             |
| RA                                    | 324 (80.8)                  |
| SLE                                   | 40 (10.0)                   |
| Sjögren's syndrome                    | 9 (2.2)                     |
| Others*                               | 28 (7.0)                    |
| Previous fracture +, n (%)            | 90 (22.4)                   |
| 2nd osteoporosis +, n (%)             | 20 (5.0)                    |
| Glucocorticoid                        |                             |
| Daily dose                            | 4.2 ± 1.7                   |
| Exposure duration, n (%)              |                             |
| ≥3 months                             | 401 (100)                   |
| ≥6 months                             | 374 (93.3)                  |
| ≥12 months                            | 364 (90.8)                  |
| ≥2 years                              | 323 (80.5)                  |
| ≥3 years                              | 289 (72.1)                  |
| Accumulative dose (mg)                |                             |
| In 3 months                           | 378.3 ± 249.6               |
| In 6 months                           | 775.6 ± 417.3               |
| Parent fractured hip +, n (%)         | 28 (7.0)                    |
| Osteoporosis +, n (%)                 | 115 (28.7)                  |
| BMD (g/cm <sup>2</sup> )              |                             |
| FN <sup>§</sup>                       | 0.636 ± 0.111               |
| TH <sup>®</sup>                       | 0.797 ± 0.140               |
| L1-4 <sup>®</sup>                     | 0.868 ± 0.166               |
| Current smoking +, n (%)              | 23 (5.7)                    |
| Alcohol +, n (%)                      | 6 (1.5)                     |
| Previous fall +, n (%)                | 75 (18.7)                   |
| FRAX                                  |                             |
| Major fracture (%)                    | 16.9 ± 12.3                 |
| Hip fracture (%)                      | 7.0 ± 8.6                   |

RA = Rheumatoid arthritis, SLE = systemic lupus erythematosus, \* this item includes vasculitis, systemic sclerosis, allergy and inflammatory myopathy, BMD = Bone mineral density, FN = femoral neck, TH = total hip, L1-4 = lumbar spine L1-L4. FRAX = Fracture Risk Assessment Tool.

**Supplementary Table S3. Demographic data of study participants in derivation and validation cohorts.**

| Variables                              | All participants<br>N= 401 | Derivation cohort<br>n=272 (67.8) | Validation cohort<br>n=129 (32.2) | p-value |
|----------------------------------------|----------------------------|-----------------------------------|-----------------------------------|---------|
| Age (years)                            | 57.5 ± 8.3                 | 57.4 ± 8.4                        | 57.6 ± 8.1                        | 0.86    |
| Female, n (%)                          | 345 (86.0)                 | 240 (88.2)                        | 105 (81.4)                        | 0.07    |
| Body weight (kgs)                      | 58.2 ± 11.0                | 58.5 ± 11.6                       | 57.7 ± 9.7                        | 0.48    |
| Body height (cm)                       | 156.4 ± 6.7                | 156.2 ± 6.8                       | 156.9 ± 6.4                       | 0.32    |
| Body mass index (kgs/cm <sup>2</sup> ) | 23.8 ± 3.9                 | 23.9 ± 4.1                        | 23.4 ± 3.3                        | 0.19    |
| New Fracture +, n(%)                   | 78 (19.5)                  | 49 (18.0)                         | 29 (22.5)                         | 0.29    |
| Fracture risk factors                  |                            |                                   |                                   |         |
| Rheumatic diseases, n(%)               |                            |                                   |                                   |         |
| RA                                     | 324 (80.8)                 | 223 (82.0)                        | 101 (78.3)                        | } 0.81  |
| SLE                                    | 40 (10.0)                  | 26 (9.6)                          | 14 (10.9)                         |         |
| Sjogren's syndrome                     | 9 (2.2)                    | 6 (2.2)                           | 3 (2.3)                           |         |
| Others                                 | 28 (7.0)                   | 17 (6.3)                          | 11 (8.5)                          |         |
| Previous fracture +, n (%)             | 90 (22.4)                  | 59 (21.7)                         | 31 (24.0)                         | 0.60    |
| 2nd Osteoporosis +, n (%)              | 20 (5.0)                   | 12 (4.4)                          | 8 (6.2)                           | 0.44    |
| Glucocorticoid                         |                            |                                   |                                   |         |
| Daily dose                             | 4.2 ± 1.7                  | 4.1 ± 1.7                         | 4.2 ± 1.6                         | 0.56    |
| Exposure duration, n (%)               |                            |                                   |                                   |         |
| ≥ 3 months                             | 401 (100)                  | 272 (100)                         | 129 (100)                         | -       |
| ≥ 6 months                             | 374 (93.3)                 | 257 (94.5)                        | 117 (90.7)                        | 0.16    |
| ≥ 12 months                            | 364 (90.8)                 | 248 (91.2)                        | 116 (89.9)                        | 0.69    |
| ≥ 2 yrs                                | 323 (80.5)                 | 219 (80.5)                        | 104 (80.6)                        | 0.98    |
| ≥ 3 yrs                                | 289 (72.1)                 | 194 (71.3)                        | 95 (73.6)                         | 0.63    |
| Accumulative dose (mg)*                |                            |                                   |                                   |         |
| 3 months                               | 378.3 ± 249.6              | 381.1 ± 272.0                     | 372.3 ± 194.6                     | 0.74    |
| 6 months                               | 775.6 ± 417.3              | 778.7 ± 444.9                     | 769.1 ± 353.5                     | 0.83    |
| Parent fractured hip +, n (%)          | 28 (7.0)                   | 18 (6.6)                          | 10 (7.8)                          | 0.68    |
| Osteoporosis +, n (%)                  | 115 (28.7)                 | 76 (27.9)                         | 39 (30.2)                         | 0.64    |
| BMD (g/cm <sup>2</sup> )               |                            |                                   |                                   |         |
| FN                                     | 0.636 ± 0.111              | 0.639 ± 0.114                     | 0.630 ± 0.104                     | 0.44    |
| TH                                     | 0.797 ± 0.140              | 0.802 ± 0.143                     | 0.787 ± 0.132                     | 0.33    |
| L1-4                                   | 0.868 ± 0.166              | 0.864 ± 0.167                     | 0.878 ± 0.163                     | 0.43    |
| Current smoking +, n (%)               | 23 (5.7)                   | 14 (5.1)                          | 9 (7.0)                           | 0.46    |
| Alcohol +, n (%)                       | 6 (1.5)                    | 3 (1.1)                           | 3 (2.3)                           | 0.35    |
| Previous Fall +, n (%)                 | 75 (18.7)                  | 51 (18.8)                         | 27 (20.9)                         | 0.61    |
| FRAX                                   |                            |                                   |                                   |         |
| Major fracture (%)                     | 16.9 ± 12.3                | 16.9 ± 12.4                       | 17.0 ± 12.2                       | 0.90    |
| Hip fracture (%)                       | 7.0 ± 8.6                  | 7.0 ± 8.9                         | 6.9 ± 7.9                         | 0.88    |

RA = Rheumatoid arthritis, SLE = systemic lupus erythematosus, \* this item includes vasculitis, systemic sclerosis, allergy and inflammatory myopathy, BMD = Bone mineral density, FN = femoral neck, TH = total hip, L1-4 = lumbar spine L1-L4. FRAX = Fracture Risk Assessment Tool.

**Supplementary Table S4. Univariate logistic regression in the derivation set.**

| Variables                              | comparison          | B-Coefficient | OR (95% CI)      | p-value |
|----------------------------------------|---------------------|---------------|------------------|---------|
| Age (years)                            | Per 1 year increase | 0.05          | 1.05 (1.01-1.09) | 0.02    |
| Female, n (%)                          | male                | 0.28          | 1.32 (0.54-3.25) | 0.55    |
| Body weight (kgs)                      | Per 1 kg increase   | 0.01          | 1.01 (0.98-1.03) | 0.53    |
| Body height (cm)                       | Per 1 cm increase   | -0.02         | 0.98 (0.94-1.03) | 0.37    |
| Body mass index (kgs/cm <sup>2</sup> ) | Per 1 unit increase | 0.63          | 1.87 (1.00-3.53) | 0.05    |
| Previous fracture +, n (%)             | No                  | 1.06          | 2.90 (1.48-5.66) | 0.002   |
| Glucocorticoid                         |                     |               |                  |         |
| Daily dose                             | Per 1 mg increase   | 0.49          | 1.64 (0.72-3.71) | 0.24    |
| Exposure duration, n (%)               |                     |               |                  |         |
| ≥ 6 months                             | < 6 months          | -0.54         | 0.58 (0.18-1.92) | 0.38    |
| ≥ 12 months                            | <12 months          | -0.20         | 0.82 (0.29-2.31) | 0.71    |
| ≥ 2 yrs                                | <2 years            | 0.09          | 1.09 (0.49-2.42) | 0.83    |
| ≥ 3 yrs                                | <3 years            | 0.13          | 1.14 (0.57-2.29) | 0.71    |
| Accumulative dose (mg)*                |                     |               |                  |         |
| 3 months, ≥ 300mg                      | < 300 mg            | 0.22          | 1.25 (0.67-2.32) | 0.48    |
| 6 months, ≥ 750mg                      | <750 mg             | 0.68          | 1.98 (1.02-3.84) | 0.04    |
| Parent fractured hip +, n (%)          | No                  | 0.28          | 1.33 (0.41-4.22) | 0.63    |
| Osteoporosis +, n (%)                  | No                  | 0.83          | 2.29 (1.21-4.36) | 0.01    |
| Current smoking +, n (%)               | No                  | 0.64          | 1.89 (0.57-6.30) | 0.30    |
| Alcohol +, n (%)                       |                     |               |                  |         |
| Previous Fall +, n (%)                 | No                  | 0.56          | 1.76 (0.85-3.62) | 0.13    |
| FRAX                                   |                     |               |                  |         |
| Major fracture (%)                     | Per 1 unit increase | 0.04          | 1.04 (1.02-1.07) | <0.001  |
| Hip fracture (%)                       | Per 1 unit increase | 0.05          | 1.06 (1.02-1.09) | 0.001   |
| Lab                                    |                     |               |                  |         |
| White blood cell (10 <sup>3</sup> /μl) | Per 1 unit increase | -0.01         | 0.99 (0.85-1.16) | 0.89    |
| Hemoglobin (g/dL)                      | Per 1 unit increase | -0.25         | 0.98 (0.77-1.24) | 0.84    |
| Platelet (10 <sup>3</sup> /μl)         | Per 1 unit increase | 0.001         | 1.00 (1.00-1.01) | 0.65    |
| BUN (mg/dL)                            | Per 1 unit increase | 0.01          | 1.01 (0.95-1.08) | 0.71    |
| Creatinine (mg/dL)                     | Per 1 unit increase | -0.99         | 0.37 (0.05-2.80) | 0.34    |
| AST (U/L)                              | Per 1 unit increase | -0.005        | 1.00 (0.97-1.02) | 0.66    |
| ALT (U/L)                              | Per 1 unit increase | -0.003        | 1.00 (0.98-1.01) | 0.66    |
| Albumin (g/dL)                         | Per 1 unit increase | 0.73          | 2.08 (0.56-7.77) | 0.28    |
| Calcium (mg/dL)                        | Per 1 unit increase | 0.007         | 1.01 (0.42-2.42) | 0.99    |
| Phosphate (mg/dL)                      | Per 1 unit increase | 0.004         | 1.00 (0.52-1.93) | 0.99    |

Supplementary Figure S1. Selection of candidate predictors by LASSO logistic regression method.

A. LASSO coefficients of 7 candidate predictors against log (Lambda)

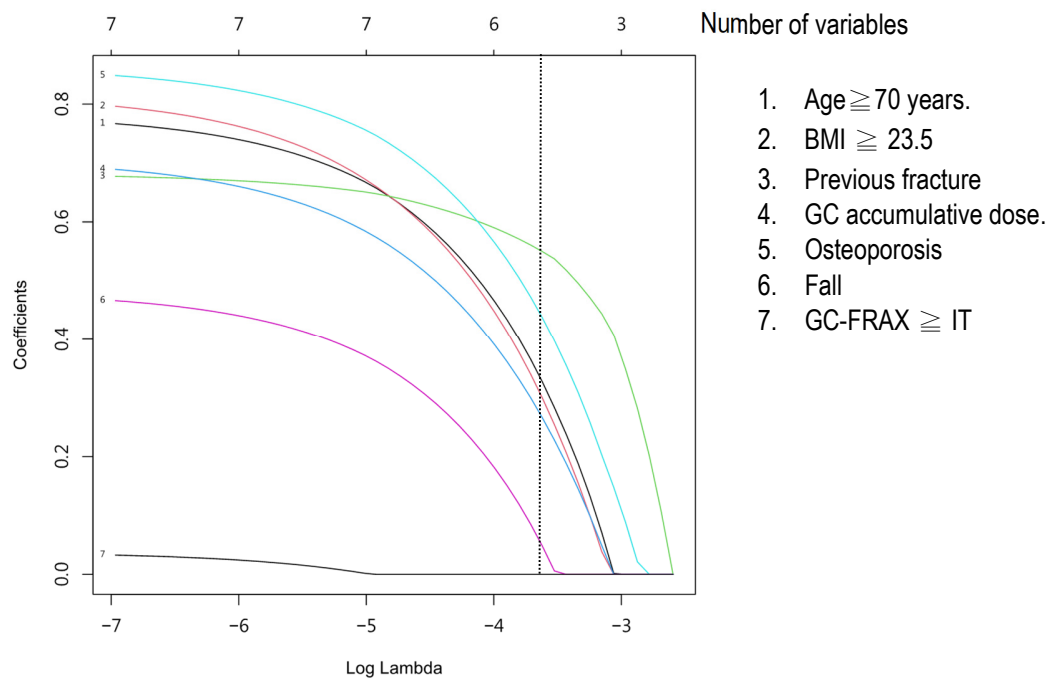

B. Binomial deviance curve versus log (lambda)

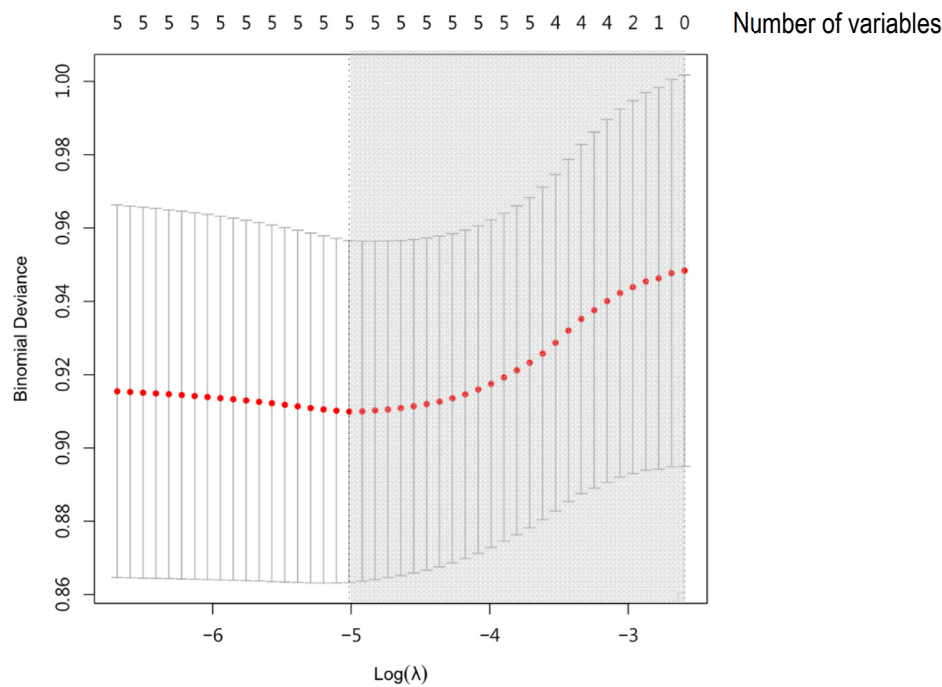

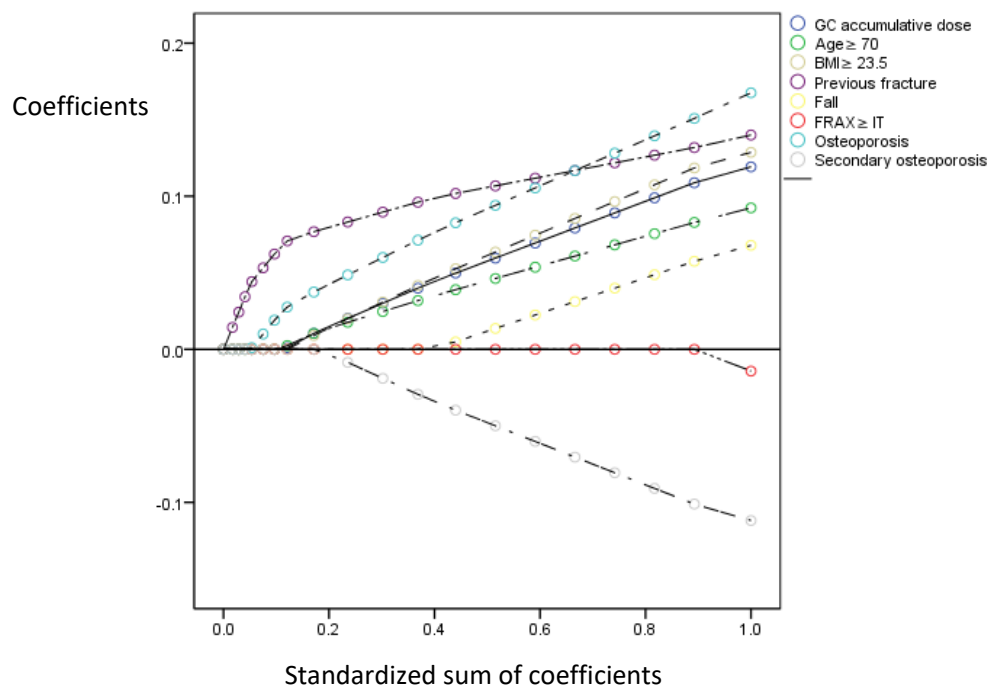

**Supplementary Table S5. Model development by adding candidate predictors in sequence (A), discriminative (B) and calibration plot (C) of selected model**

**(A) Model development**

| Test model | Predictors                                                                                       | Score range | ROC curve |                |                         |         | Hosmer-Lemeshow test |         |
|------------|--------------------------------------------------------------------------------------------------|-------------|-----------|----------------|-------------------------|---------|----------------------|---------|
|            |                                                                                                  |             | AUC       | Standard error | 95% confidence interval | p-value | Chi-square ( $X^2$ ) | p-value |
| A          | Previous Fracture + Osteoporosis                                                                 | 0-2         | 0.65      | 0.05           | 0.56-0.74               | 0.001   | 0.07                 | 0.97    |
| B          | Previous Fracture + Osteoporosis + BMI                                                           | 0-3         | 0.68      | 0.04           | 0.60-0.76               | <0.001  | 0.58                 | 0.97    |
| C          | Previous Fracture + Osteoporosis + BMI + GC accumulative dose                                    | 0-4         | 0.70      | 0.04           | 0.62-0.78               | <0.001  | 4.43                 | 0.62    |
| D          | Previous Fracture + Osteoporosis + BMI + GC accumulative dose + Age (x2)                         | 0-6         | 0.71      | 0.04           | 0.64-0.79               | <0.001  | 8.24                 | 0.22    |
| E          | Previous Fracture + Osteoporosis + BMI + GC accumulative dose + Age (x2) + Fall                  | 0-7         | 0.73      | 0.04           | 0.65-0.80               | <0.001  | 7.13                 | 0.42    |
| F          | Previous Fracture + Osteoporosis + BMI + GC accumulative dose + Age (x2) + Fall + FRAX $\geq$ IT | 0-8         | 0.71      | 0.04           | 0.64-0.79               | <0.001  | 6.63                 | 0.58    |

**(B) Discriminative performance of model D**

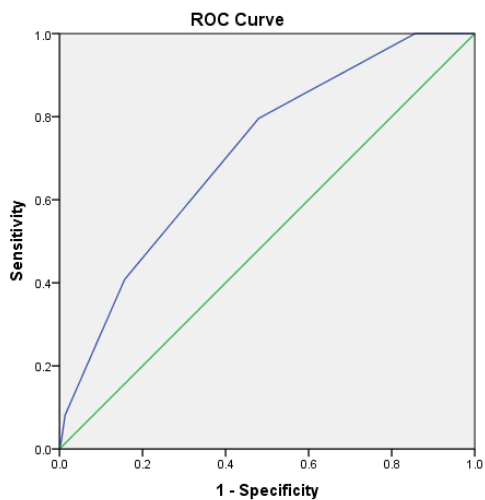

**(C) Calibration plot of model D.**

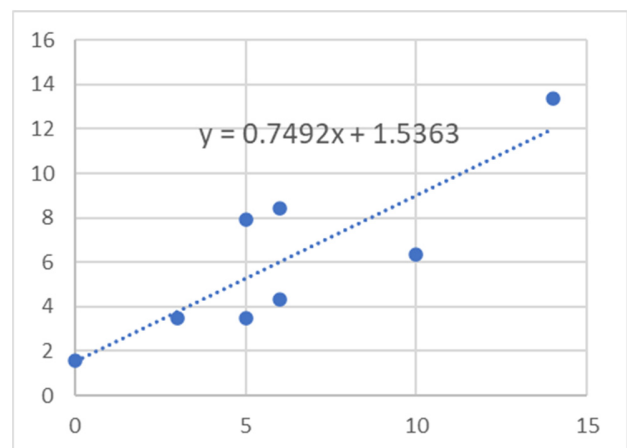



## Reference

1. Lekamwasam, S.; Adachi, J.D.; Agnusdei, D.; Bilezikian, J.; Boonen, S.; Borgstrom, F.; Cooper, C.; Diez Perez, A.; Eastell, R.; Hofbauer, L.C.; et al. A framework for the development of guidelines for the management of glucocorticoid-induced osteoporosis. *Osteoporos Int* **2012**, *23*, 2257-2276, doi:10.1007/s00198-012-1958-1.
2. Buckley, L.; Guyatt, G.; Fink, H.A.; Cannon, M.; Grossman, J.; Hansen, K.E.; Humphrey, M.B.; Lane, N.E.; Magrey, M.; Miller, M.; et al. 2017 American College of Rheumatology Guideline for the Prevention and Treatment of Glucocorticoid-Induced Osteoporosis. *Arthritis Rheumatol* **2017**, *69*, 1521-1537, doi:10.1002/art.40137.
3. Humphrey, M.B.; Russell, L.; Danila, M.I.; Fink, H.A.; Guyatt, G.; Cannon, M.; Caplan, L.; Gore, S.; Grossman, J.; Hansen, K.E.; et al. 2022 American College of Rheumatology Guideline for the Prevention and Treatment of Glucocorticoid-Induced Osteoporosis. *Arthritis Care Res (Hoboken)* **2023**, *75*, 2405-2419, doi:10.1002/acr.25240.
